# Supplementary material for: PEGDA hydrogel structure from semi-dilute concentrations: insights from experiments and molecular simulations
Source: Royal Society of Chemistry journal article supplement (doi:10.1039/d1sm01708j), 2022-01-01
Supplement: d1sm01708j1.pdf [file d1sm01708j1.pdf]

## SUPPLEMENTARY INFORMATION

### *PEGDA Hydrogel Structure from Semi-Dilute Concentrations: Insights from Experiments and Molecular Simulations*

Jomary Mercado-Montijo,<sup>a</sup> Dylan M. Anstine,<sup>ab</sup> Shalini J. Rukmani,<sup>ab</sup> Coray M. Colina<sup>abc</sup> and Jennifer S. Andrew<sup>a</sup>

<sup>a</sup> Department of Materials Science and Engineering, University of Florida, Gainesville, Florida 32611, United States.

<sup>b</sup> George and Josephine Butler Polymer Research Laboratory, University of Florida, Gainesville, Florida 32611, United States.

<sup>c</sup> Department of Chemistry, University of Florida, Gainesville, Florida 32611, United States

Correspondence

[jandrew@mse.ufl.edu](mailto:jandrew@mse.ufl.edu)

[colina@chem.ufl.edu](mailto:colina@chem.ufl.edu)

| Parameter  | Description                                      | Value                   |
|------------|--------------------------------------------------|-------------------------|
| $\chi$     | Flory Huggin's PEG-water interaction constant    | 0.426                   |
| $V_1$      | Molar volume of water                            | 18 cm <sup>3</sup> /mol |
| $\rho_d$   | Dry density of PEG                               | 1.12 g/cm <sup>3</sup>  |
| $M_r$      | Molecular weight of PEG repeating unit           | 44 g/mol                |
| $C_\infty$ | PEG characteristic ratio                         | 4                       |
| $\lambda$  | PEG backbone bond factor                         | 3                       |
| $\bar{l}$  | Weighted mean bond length for PEG repeating unit | 0.1464 nm               |

**Table S2.** Summary of the number of water molecules in each simulated hydrogel sample.

| Number of Water Molecules / Simulation Cell |         |        |
|---------------------------------------------|---------|--------|
| Conc. (wt. %)                               | 4.8 kDa | 10 kDa |
| 15                                          | 5849    | 17621  |
| 20                                          | 4431    | 14784  |
| 25                                          | 4003    | 12812  |
| 30                                          | 3382    | 11392  |
| 35                                          | 3147    | 9646   |
| 40                                          | 3015    | 9242   |
| 50                                          | 2735    | 8066   |
| 60                                          | 2337    | 7396   |
| 70                                          | 2121    | -      |

**Table S3.** Summary of the average number density of polymer chain-chain contacts over each 200 ns simulation trajectory

| Number density of chain-chain contacts ( $\text{\AA}^{-3}$ ) |               |               |
|--------------------------------------------------------------|---------------|---------------|
| Conc. (wt. %)                                                | 4.8 kDa       | 10 kDa        |
| 15                                                           | 0.155 (0.011) | 0.109 (0.002) |
| 20                                                           | 0.201 (0.017) | 0.127 (0.003) |
| 25                                                           | 0.214 (0.013) | 0.150 (0.003) |
| 30                                                           | 0.257 (0.022) | 0.161 (0.004) |
| 35                                                           | 0.274 (0.018) | 0.188 (0.004) |
| 40                                                           | 0.270 (0.014) | 0.197 (0.006) |
| 50                                                           | 0.298 (0.020) | 0.220 (0.004) |
| 60                                                           | 0.372 (0.041) | 0.234 (0.004) |
| 70                                                           | 0.410 (0.050) | -             |

A chain-chain contact is defined by the number of instances where a polymer atom is within 3.5 Å of another polymer atom. The cutoff was chosen to be similar to the sigma parameters from the applied force field. The exact choice of cutoff has a minimal influence on the relative comparison between concentrations and only affects the total number of contacts. Numbers in parenthesis denote the standard deviation over the 200 ns trajectory.

**NOTE:** Reference error in main manuscript. Look at **Table S3** for the calculated number density of chain–chain contacts in PEGDA hydrogels.

| <b>Table S4.</b> Summary of the maximum pore diameter peaks across all simulated hydrogel samples and the ratio between macromer molar masses. |                    |                    |                  |             |
|------------------------------------------------------------------------------------------------------------------------------------------------|--------------------|--------------------|------------------|-------------|
|                                                                                                                                                | 4.8 kDa            | 10 kDa             | 10 kDa / 4.8 kDa |             |
| Conc. (wt. %)                                                                                                                                  | pore diameter (nm) | pore diameter (nm) | pore peak ratio  | uncertainty |
| 15                                                                                                                                             | 3.58               | 5.37               | 1.50             | 0.18        |
| 20                                                                                                                                             | 3.05               | 4.71               | 1.55             | 0.22        |
| 25                                                                                                                                             | 2.82               | 4.54               | 1.61             | 0.22        |
| 30                                                                                                                                             | 2.61               | 4.17               | 1.60             | 0.22        |
| 35                                                                                                                                             | 2.60               | 3.61               | 1.39             | 0.18        |
| 40                                                                                                                                             | 2.54               | 3.82               | 1.51             | 0.22        |
| 50                                                                                                                                             | 2.37               | 3.53               | 1.49             | 0.20        |
| 60                                                                                                                                             | 2.30               | 3.19               | 1.39             | 0.19        |
| 70                                                                                                                                             | 2.26               | -                  | -                | -           |

The ratio of maximum pore diameter peaks is approximately equal to the ratio of  $\sqrt{n_{10\text{ kDa}}}/\sqrt{n_{4.8\text{ kDa}}} = 1.46$ , where n is the number of backbone bonds per macromer chain.

| <b>Table S5.</b> Full Width at Half Maximum of PEGDA computational hydrogel models across a range of initial solution concentrations (conc.). |             |            |
|-----------------------------------------------------------------------------------------------------------------------------------------------|-------------|------------|
| Conc. (wt. %)                                                                                                                                 | 4.8 kDa (Å) | 10 kDa (Å) |
| 15                                                                                                                                            | 12.83       | 17.43      |
| 20                                                                                                                                            | 12.36       | 17.95      |
| 25                                                                                                                                            | 11.93       | 16.55      |
| 30                                                                                                                                            | 10.56       | 15.57      |
| 35                                                                                                                                            | 10.66       | 15.06      |
| 40                                                                                                                                            | 9.51        | 15.41      |
| 50                                                                                                                                            | 8.71        | 13.70      |
| 60                                                                                                                                            | 8.91        | 13.74      |
| 70                                                                                                                                            | 8.1         | -          |

The full width at half maximum is a measure of the breadth of a unimodal distribution, and therefore, is an effective measure of the average pore dynamics.

### Additional viscosity measurements – Overlap Concentration C\*

Additional viscosity measurements were obtained using micro-rheology. Briefly, carboxylated polystyrene particles (radius  $\sim 0.8 \mu\text{m}$ ) were suspended with a total mass fraction of 0.04% in PEGDA solutions and their trajectory was tracked using microscopy. The viscosity was calculated from Stokes-Einstein equation by estimating the diffusion coefficient of the particles in solution.

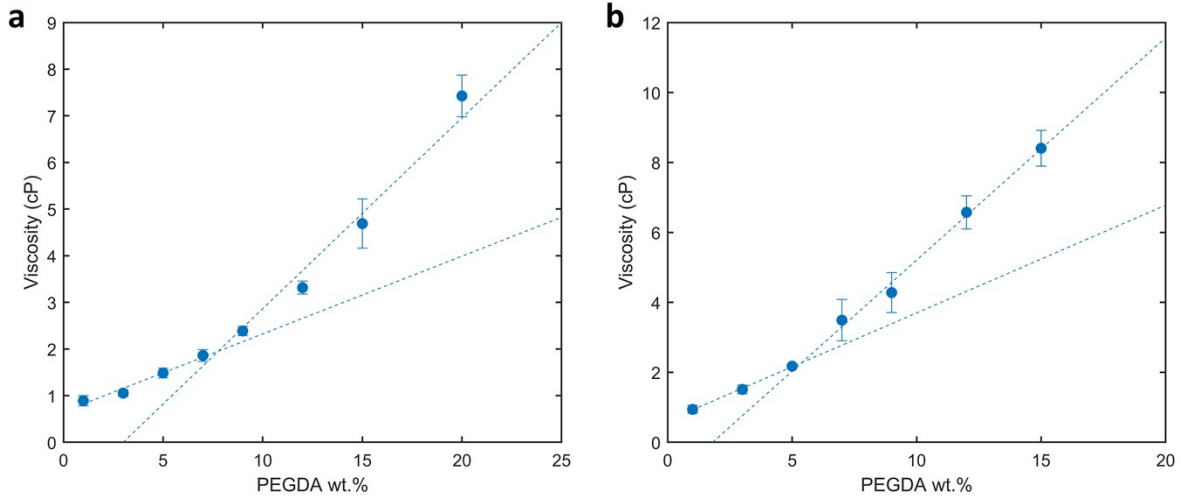

**Figure S1.** Viscosity plots for a) PEGDA 4.8 and b) 10 kDa solutions from micro-rheology measurements. Inflection point of each corresponds to an overlap concentration of 8.3 and 5.4 wt.% for 4.8 and 10 kDa, respectively.

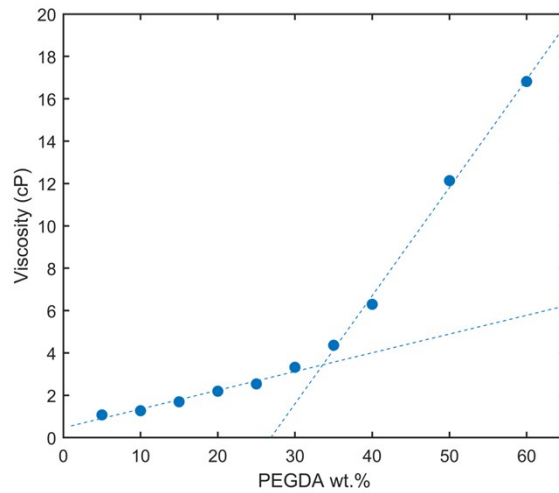

**Figure S2.** Viscosity plot for PEGDA 700 Da solutions from micro-rheology measurements. Inflection point corresponds to an overlap concentration of 33.6 wt.%.

### End-to-end distance mesh size

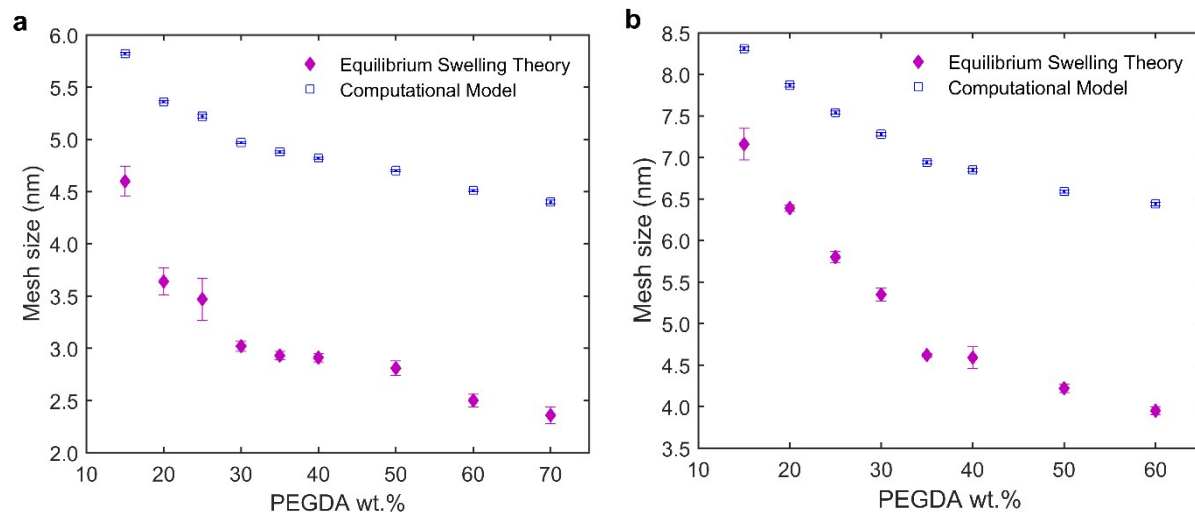

**Figure S3.** Mesh size as the end-to-end distance between crosslinks between equilibrium swelling theory measurements from an effective hydrogel representation ( $\blacklozenge$ ) and from the computational model ( $\square$ ) for a) PEGDA 4.8 kDa and b) PEGDA 10 kDa.

### Dynamic pore size distribution

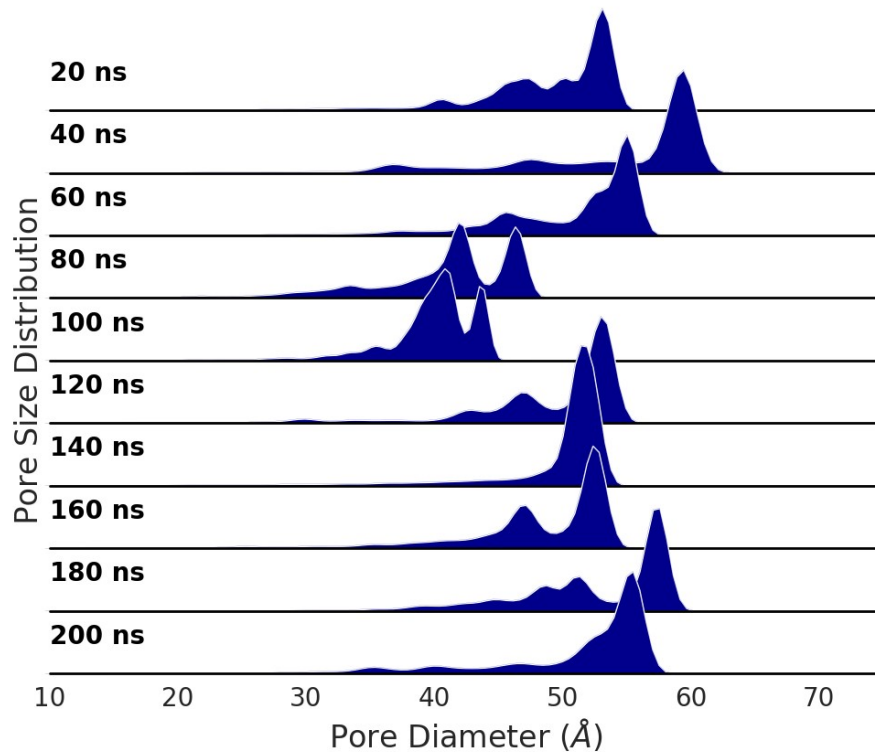

**Figure S4** Dynamic pore size distributions (DPSDs) for 10 kDa computational hydrogel models corresponding to a pre-gel solution concentration of 20 wt%. A small smoothing factor has been applied for ease of visualization.

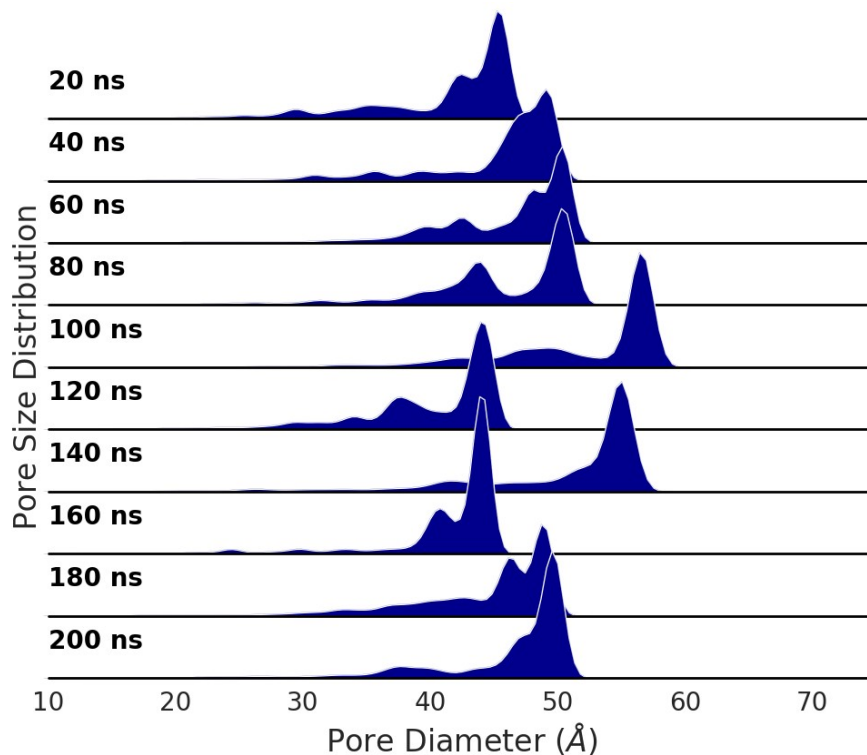

**Figure S5** Dynamic pore size distributions (DPSDs) for 10 kDa computational hydrogel models corresponding to a pre-gel solution concentration of 25 wt%. A small smoothing factor has been applied for ease of visualization.

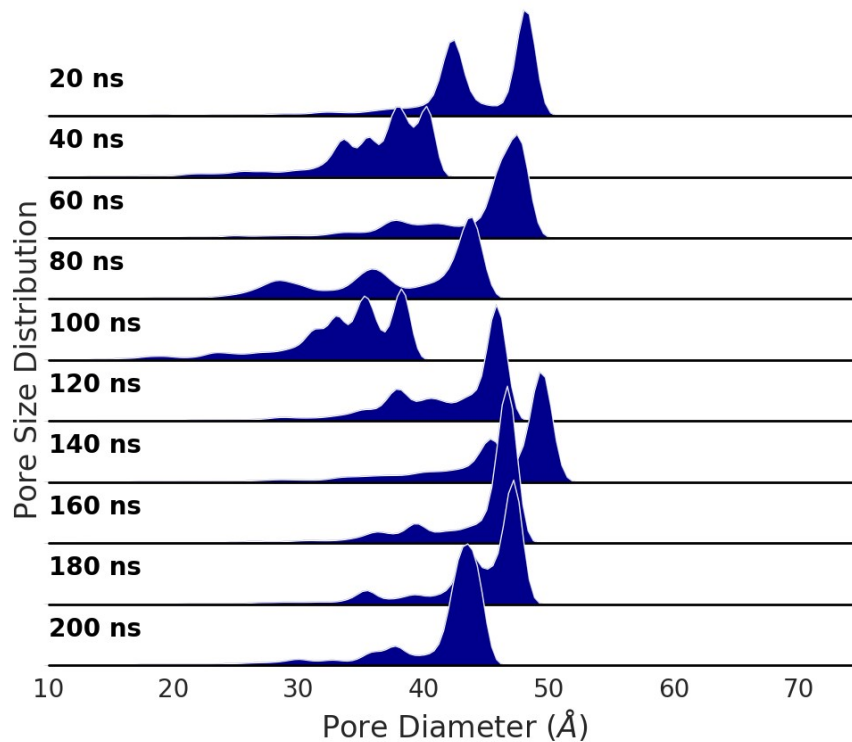

**Figure S6** Dynamic pore size distributions (DPSDs) for 10 kDa computational hydrogel models corresponding to a pre-gel solution concentration of 30 wt%. A small smoothing factor has been applied for ease of visualization.



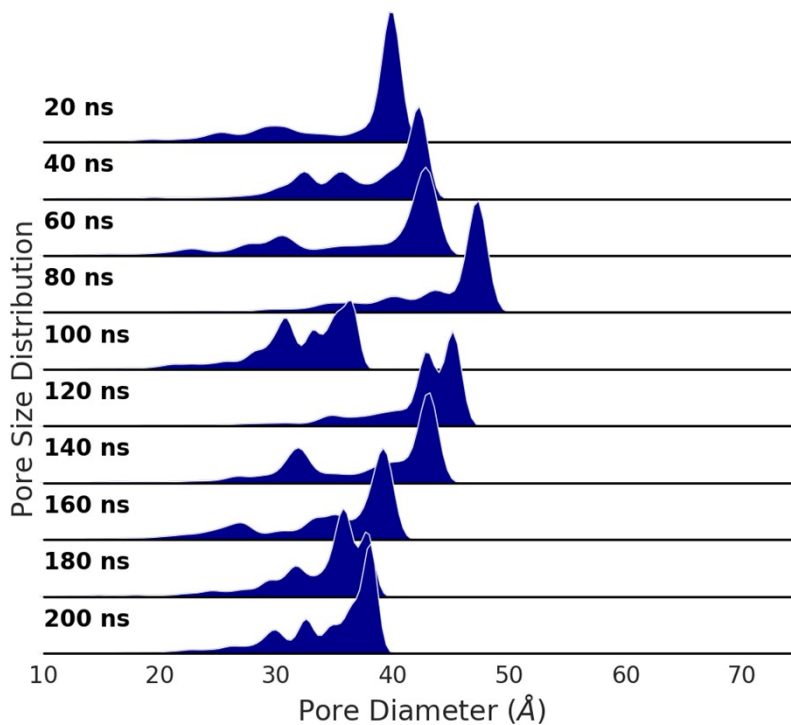

**Figure S7** Dynamic pore size distributions (DPSDs) for 10 kDa computational hydrogel models corresponding to a pre-gel solution concentration of 35 wt%. A small smoothing factor has been applied for ease of visualization.

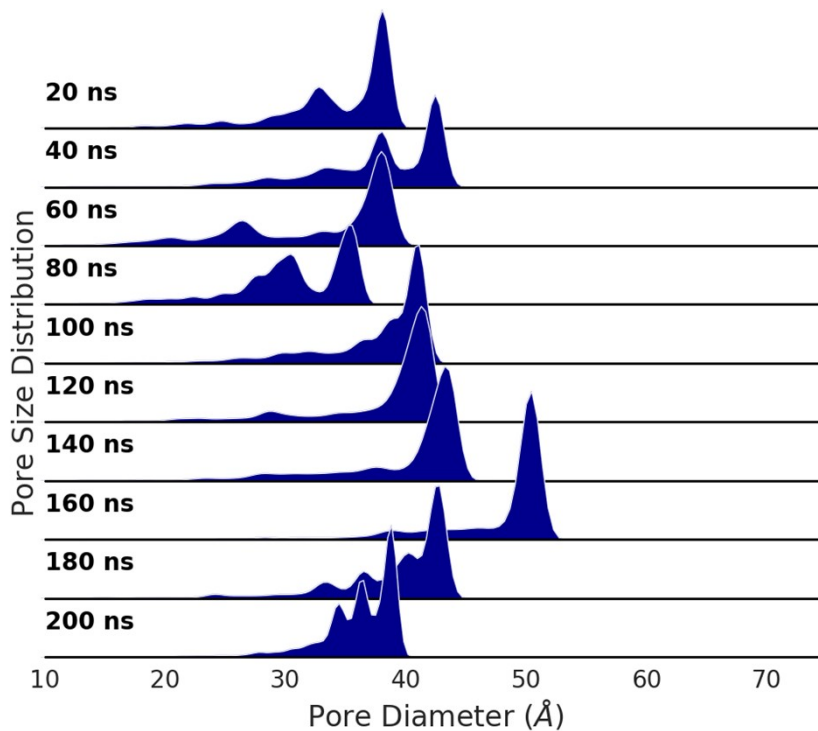

**Figure S8** Dynamic pore size distributions (DPSDs) for 10 kDa computational hydrogel models corresponding to a pre-gel solution concentration of 40 wt%. A small smoothing factor has been applied for ease of visualization.

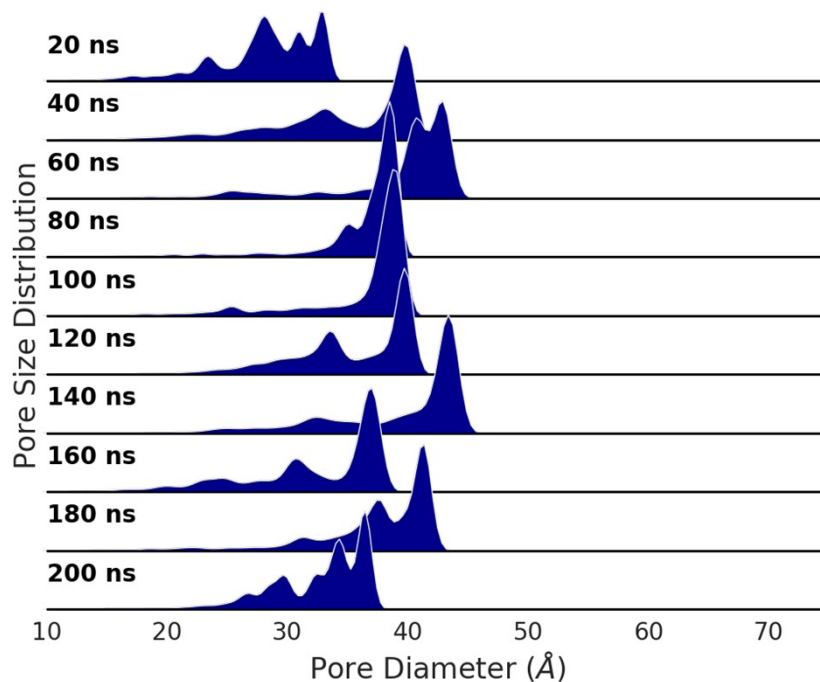

**Figure S9** Dynamic pore size distributions (DPSDs) for 10 kDa computational hydrogel models corresponding to a pre-gel solution concentration of 50 wt%. A small smoothing factor has been applied for ease of visualization.

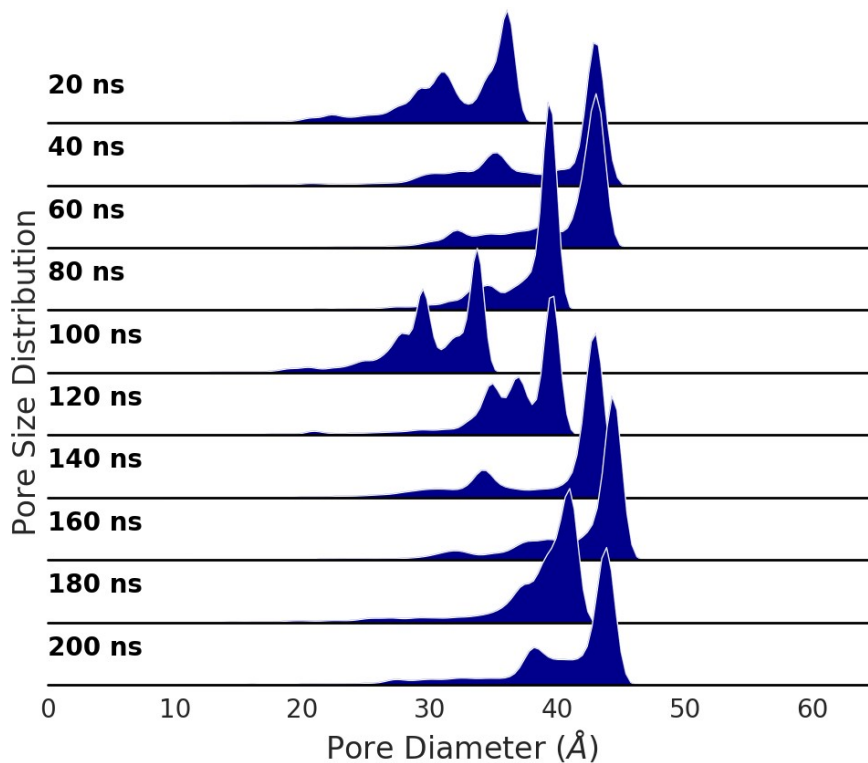

**Figure S10** Dynamic pore size distributions (DPSDs) for 4.8 kDa computational hydrogel models corresponding to a pre-gel solution concentration of 15 wt%. A small smoothing factor has been applied for ease of visualization.

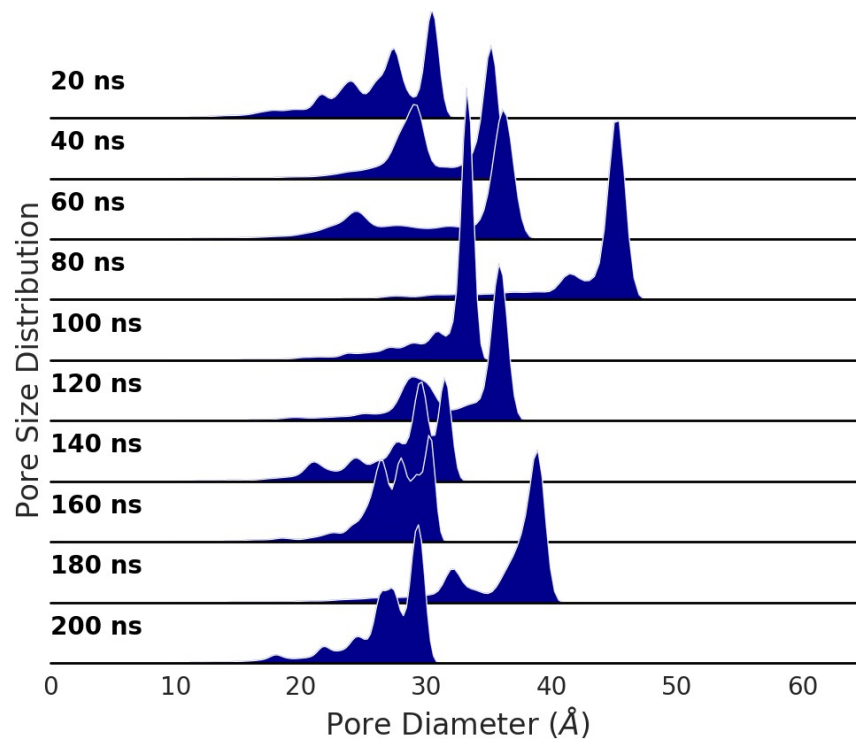

**Figure S11** Dynamic pore size distributions (DPSDs) for 4.8 kDa computational hydrogel models corresponding to a pre-gel solution concentration of 20 wt%. A small smoothing factor has been applied for ease of visualization.

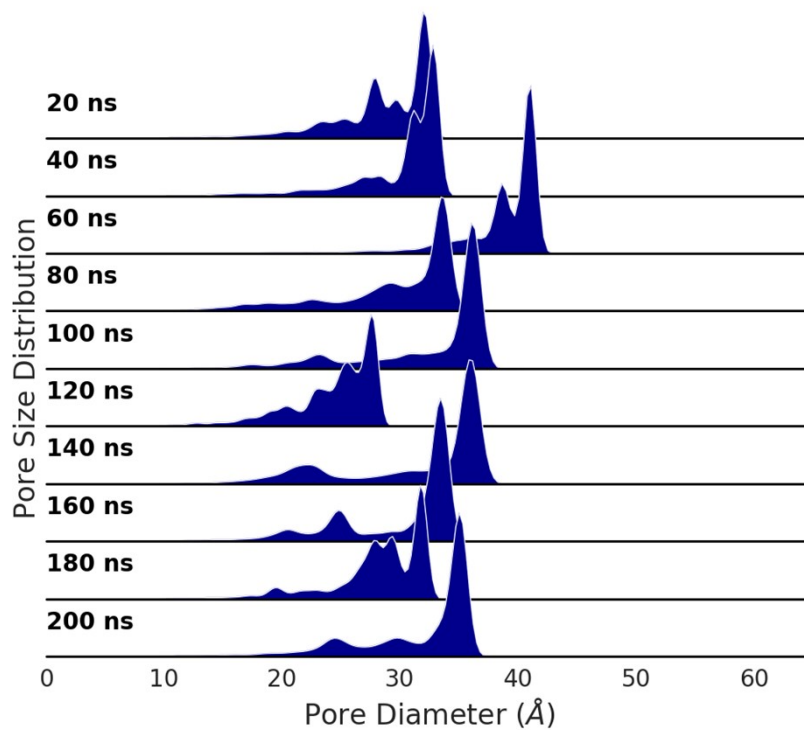

**Figure S12** Dynamic pore size distributions (DPSDs) for 4.8 kDa computational hydrogel models corresponding to a pre-gel solution concentration of 25 wt%. A small smoothing factor has been applied for ease of visualization.

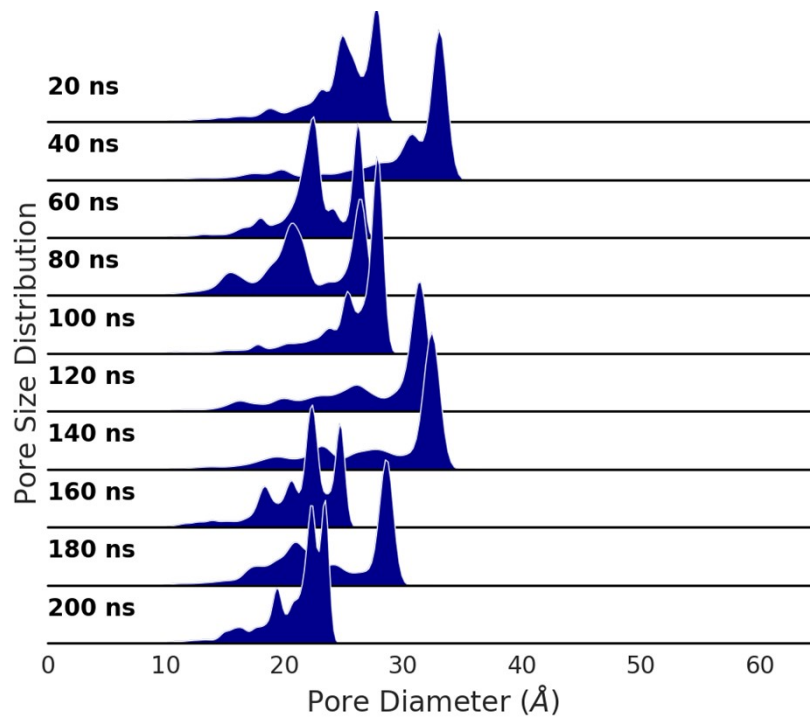

**Figure S13** Dynamic pore size distributions (DPSDs) for 4.8 kDa computational hydrogel models corresponding to a pre-gel solution concentration of 30 wt%. A small smoothing factor has been applied for ease of visualization.

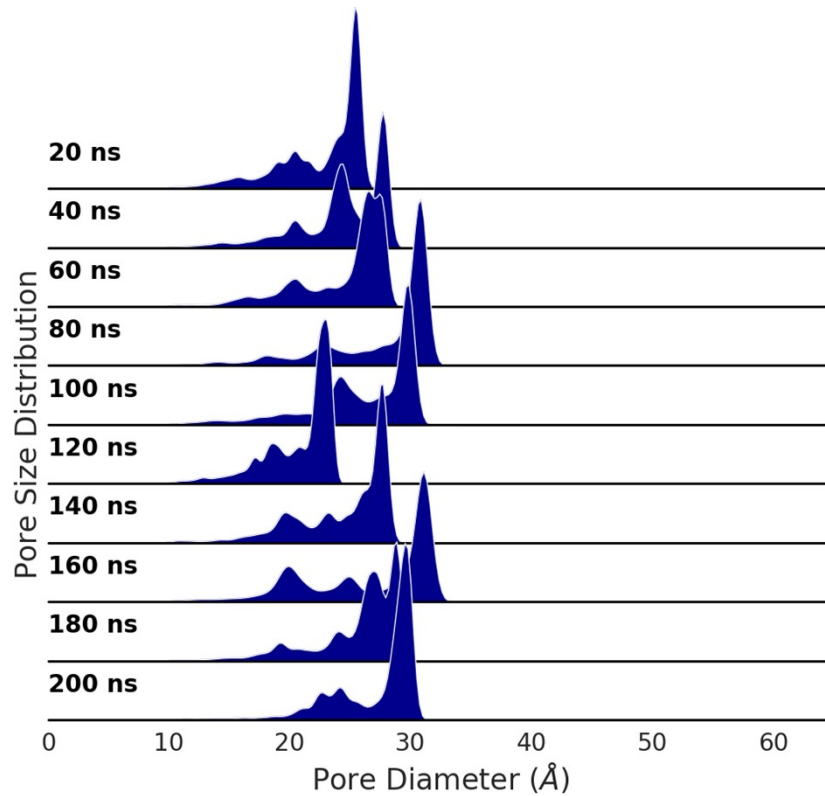

**Figure S14** Dynamic pore size distributions (DPSDs) for 4.8 kDa computational hydrogel models corresponding to a pre-gel solution concentration of 35 wt%. A small smoothing factor has been applied for ease of visualization.

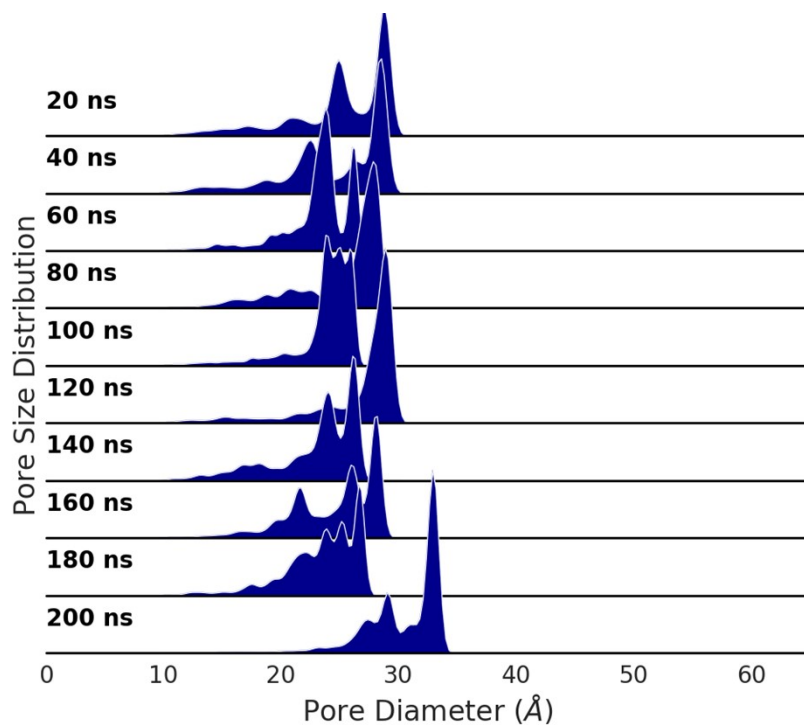

**Figure S15** Dynamic pore size distributions (DPSDs) for 4.8 kDa computational hydrogel models corresponding to a pre-gel solution concentration of 40 wt%. A small smoothing factor has been applied for ease of visualization.

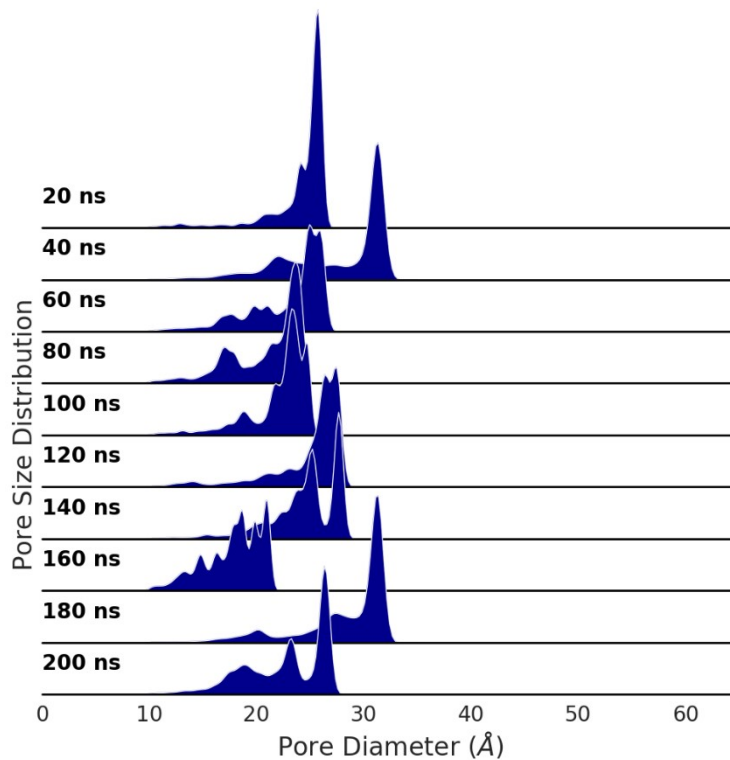

**Figure S16** Dynamic pore size distributions (DPSDs) for 4.8 kDa computational hydrogel models corresponding to a pre-gel solution concentration of 50 wt%. A small smoothing factor has been applied for ease of visualization.

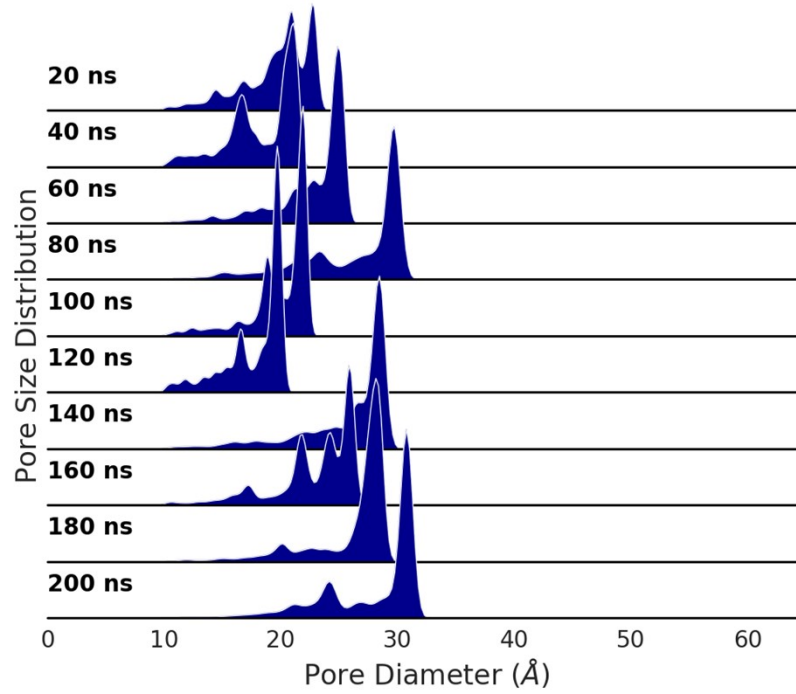

**Figure S17** Dynamic pore size distributions (DPSDs) for 4.8 kDa computational hydrogel models corresponding to a pre-gel solution concentration of 60 wt%. A small smoothing factor has been applied for ease of visualization.

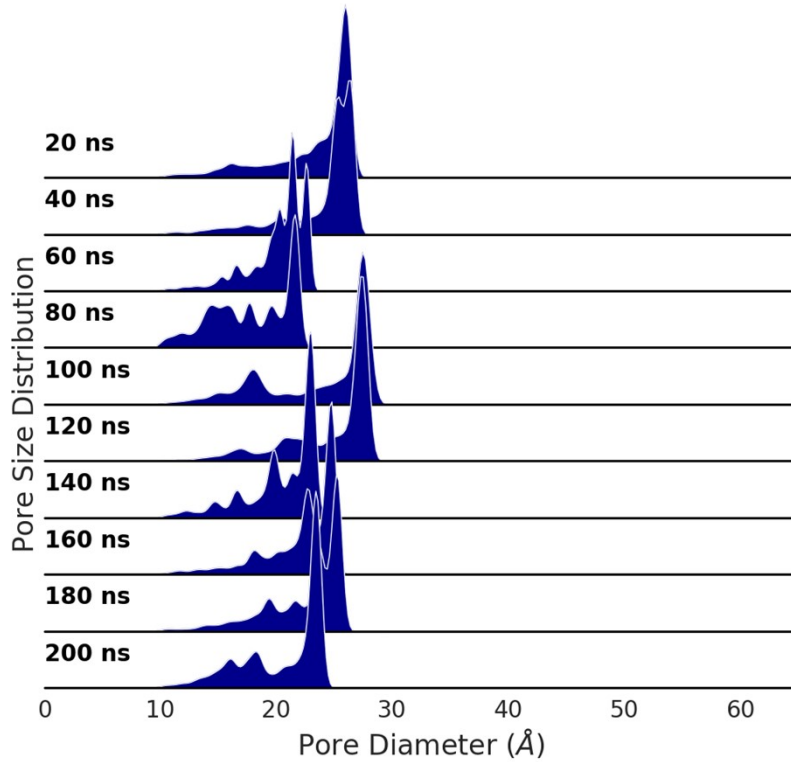

**Figure S18** Dynamic pore size distributions (DPSDs) for 4.8 kDa computational hydrogel models corresponding to a pre-gel solution concentration of 70 wt%. A small smoothing factor has been applied for ease of visualization.
